# Supplementary material for: The Genetic Regulation of Alternative Splicing in Populus deltoides
Source: Front Plant Sci. 2020 Jun 5;11:590. doi: 10.3389/fpls.2020.00590 (PMC7291814; doi:10.3389/fpls.2020.00590)
Supplement: TABLE S1 — Pfam domains identified for novel isoforms identified during transcriptome assembly. [file Table_1.XLSX]

## Sheet: novel_xscripts_x_ath_topHits
gene	isoform	arabidopsis_homolog	bit_score
XLOC_002620	TCONS_00009430	AT2G38185	99.8
XLOC_003868	TCONS_00014076	AT3G15110	50.8
XLOC_006945	TCONS_00024242	AT5G42905	69.3
XLOC_009356	TCONS_00032139	AT5G58490	69.7
XLOC_010802	TCONS_00036766	AT3G63270	577
XLOC_010802	TCONS_00036767	AT3G63270	592
XLOC_010802	TCONS_00036769	AT3G63270	553
XLOC_011532	TCONS_00039975	AT1G79580	44.7
XLOC_014081	TCONS_00050128	AT5G49665	645
XLOC_015452	TCONS_00054783	AT1G05805	103
XLOC_019953	TCONS_00071740	AT1G16820	57.4
XLOC_021873	TCONS_00077947	AT3G19120	627
XLOC_021873	TCONS_00077948	AT3G19120	352
XLOC_021873	TCONS_00077949	AT3G19120	197
XLOC_021899	TCONS_00078019	ATCG00300	62.4
XLOC_022030	TCONS_00078355	AT5G53670	112
XLOC_022160	TCONS_00078827	AT5G67610	50.8
XLOC_022160	TCONS_00078828	AT4G39400	38.5
XLOC_022935	TCONS_00081340	AT1G11800	77
XLOC_022977	TCONS_00081522	AT4G23160	160
XLOC_022977	TCONS_00081525	AT4G23160	160
XLOC_022977	TCONS_00081526	AT4G23160	160
XLOC_023009	TCONS_00081726	AT5G36890	42.4
XLOC_023009	TCONS_00081729	AT1G61820	48.5
XLOC_023374	TCONS_00082934	AT4G18640	37.7
XLOC_023744	TCONS_00084234	AT1G10740	167
XLOC_025267	TCONS_00089489	AT1G20230	44.7
XLOC_025267	TCONS_00089491	AT1G20230	44.7
XLOC_025267	TCONS_00089492	AT1G20230	44.7
XLOC_025433	TCONS_00090125	AT5G26860	154
XLOC_025506	TCONS_00090287	AT1G56345	87.4
XLOC_025729	TCONS_00090975	AT3G04970	53.9
XLOC_026595	TCONS_00094223	AT2G01021	50.8
XLOC_026775	TCONS_00094803	ATCG01130	55.1
XLOC_027928	TCONS_00099097	AT1G20230	44.7
XLOC_028006	TCONS_00099314	AT4G34135	130
XLOC_028006	TCONS_00099315	AT2G15490	62.8
XLOC_028390	TCONS_00100592	AT3G01610	35.8
XLOC_028458	TCONS_00100899	AT5G09500	57
XLOC_029166	TCONS_00103861	AT2G01021	50.8
XLOC_029987	TCONS_00106558	AT1G72500	45.8
XLOC_029987	TCONS_00106559	AT1G19110	46.2
XLOC_030137	TCONS_00107320	AT1G04200	49.7
XLOC_030137	TCONS_00107321	AT1G04200	105
XLOC_030137	TCONS_00107323	AT1G04200	105
XLOC_030367	TCONS_00108366	AT1G76440	43.5
XLOC_030381	TCONS_00108461	AT1G76510	115
XLOC_031698	TCONS_00113208	AT4G23160	117
XLOC_032308	TCONS_00115086	AT4G20520	56.6
XLOC_032308	TCONS_00115088	AT4G20520	56.6
XLOC_032310	TCONS_00115099	AT5G57700	64.7
XLOC_033703	TCONS_00120518	AT5G04050	639
XLOC_034993	TCONS_00125498	AT5G57690	213
XLOC_035455	TCONS_00127393	AT5G12010	408
XLOC_035855	TCONS_00128987	AT2G24610	178
XLOC_036772	TCONS_00132667	AT3G19970	185
XLOC_036772	TCONS_00132668	AT3G19970	115
XLOC_037354	TCONS_00134774	AT3G09500	40.8
XLOC_037380	TCONS_00134868	AT2G43940	55.8
XLOC_038617	TCONS_00139531	AT3G59360	62.8
XLOC_039170	TCONS_00142249	AT2G38970	795
XLOC_039260	TCONS_00142705	AT3G57770	55.8
XLOC_041394	TCONS_00151479	AT2G38970	390
XLOC_041868	TCONS_00153998	AT3G24255	31.6
XLOC_042985	TCONS_00158674	ATMG01360	81.6
XLOC_043168	TCONS_00159056	AT4G15830	45.1
XLOC_043305	TCONS_00159500	AT5G60710	688
XLOC_043305	TCONS_00159501	AT5G60710	714
XLOC_044044	TCONS_00162796	AT1G49700	42
XLOC_044174	TCONS_00163277	AT3G19120	608
XLOC_044816	TCONS_00165915	AT5G60710	740
XLOC_044982	TCONS_00166469	AT5G60550	50.8
XLOC_044984	TCONS_00166472	AT1G78890	47.8
XLOC_044984	TCONS_00166473	AT1G78890	47.8
XLOC_046010	TCONS_00170825	AT3G06895	37.4
XLOC_048989	TCONS_00182368	AT4G15940	54.7
XLOC_049411	TCONS_00183749	AT4G31940	56.2
XLOC_050088	TCONS_00186873	AT2G35750	42.4
XLOC_050724	TCONS_00189468	AT5G59613	35.8
XLOC_051061	TCONS_00191275	AT2G38970	612
XLOC_051061	TCONS_00191276	AT2G38970	551
XLOC_051247	TCONS_00192241	AT1G28350	82.8
XLOC_052985	TCONS_00197113	AT5G42110	37.4
XLOC_054235	TCONS_00200973	AT1G78510	130
XLOC_054235	TCONS_00200979	AT1G78510	177
XLOC_054235	TCONS_00200980	AT1G78510	165
XLOC_055762	TCONS_00206007	AT2G07706	38.9
XLOC_055974	TCONS_00206882	AT4G34140	59.3
XLOC_057082	TCONS_00210653	AT5G41980	330
XLOC_057331	TCONS_00211558	AT2G07706	38.9
XLOC_057847	TCONS_00213329	AT3G52750	40
XLOC_060948	TCONS_00224492	AT1G14300	434
XLOC_060948	TCONS_00224496	AT1G14300	442
XLOC_062844	TCONS_00231606	AT5G42390	227
XLOC_062885	TCONS_00231767	AT5G15330	61.2
XLOC_063083	TCONS_00232566	AT3G07550	49.7
XLOC_063308	TCONS_00233015	AT2G01021	45.4
XLOC_063308	TCONS_00233019	AT2G01021	45.4
XLOC_063505	TCONS_00233557	AT3G13020	445
XLOC_063646	TCONS_00233807	AT3G48200	34.7
XLOC_064479	TCONS_00237239	AT2G46540	43.5
XLOC_065380	TCONS_00240525	AT2G01021	45.8
XLOC_065380	TCONS_00240526	AT2G01021	45.8
XLOC_065380	TCONS_00240527	AT2G01021	45.8
XLOC_065382	TCONS_00240530	AT2G01021	45.4
XLOC_065382	TCONS_00240531	AT2G01021	45.4
XLOC_065382	TCONS_00240532	AT2G01021	45.4
XLOC_065465	TCONS_00240668	AT3G07170	52
XLOC_066878	TCONS_00245859	AT3G58660	37.4
XLOC_067257	TCONS_00247138	AT5G53450	111
XLOC_067448	TCONS_00247909	AT5G41980	484
XLOC_067966	TCONS_00249542	AT1G10710	49.3
XLOC_070105	TCONS_00257247	AT1G29750	299
XLOC_070105	TCONS_00257248	AT1G53430	142
XLOC_070105	TCONS_00257250	AT1G07650	239
XLOC_070105	TCONS_00257251	AT1G53440	344
XLOC_070105	TCONS_00257252	AT1G53440	385
XLOC_070105	TCONS_00257253	AT1G53430	228
XLOC_070105	TCONS_00257254	AT1G53440	394
XLOC_070994	TCONS_00260323	ATMG00410	75.5
XLOC_072966	TCONS_00266195	AT5G37510	388
XLOC_072966	TCONS_00266196	AT5G37510	283
XLOC_075423	TCONS_00273806	AT4G29780	617
XLOC_076900	TCONS_00279319	ATCG01130	109
XLOC_076980	TCONS_00279654	AT5G12010	677
XLOC_077344	TCONS_00280642	AT2G15180	51.6
XLOC_077626	TCONS_00281754	AT1G72270	275
XLOC_079522	TCONS_00287077	AT2G26560	58.5
XLOC_080681	TCONS_00290498	AT4G35150	52.8
XLOC_080940	TCONS_00291135	AT2G26560	58.5
XLOC_080940	TCONS_00291136	AT2G26560	58.5
XLOC_081507	TCONS_00292139	AT4G06744	213
XLOC_081511	TCONS_00292143	AT5G35930	86.3
XLOC_081610	TCONS_00292268	AT3G03440	60.5
XLOC_081667	TCONS_00292350	AT5G44200	142
XLOC_081884	TCONS_00292656	AT5G40990	184
XLOC_082008	TCONS_00292835	AT5G41980	84.7
XLOC_082024	TCONS_00292856	AT1G16820	51.2
XLOC_082025	TCONS_00292857	AT3G06895	49.7
XLOC_082155	TCONS_00293191	AT3G53260	71.2
XLOC_082158	TCONS_00293194	AT3G53260	71.6
XLOC_082293	TCONS_00293386	AT3G26040	274
XLOC_082324	TCONS_00293422	AT3G13160	264
XLOC_082401	TCONS_00293516	AT5G24380	62.4
XLOC_082401	TCONS_00293517	AT5G24380	64.3
XLOC_082401	TCONS_00293519	AT5G24380	63.9
XLOC_082401	TCONS_00293521	AT5G24380	63.2
XLOC_083077	TCONS_00294568	AT3G03250	232
XLOC_083193	TCONS_00294717	ATCG00480	337
XLOC_083533	TCONS_00295198	ATCG01110	272
XLOC_083545	TCONS_00295210	AT2G03290	81.6
XLOC_083605	TCONS_00295282	AT3G28050	49.7
XLOC_083618	TCONS_00295311	AT5G28750	39.3
XLOC_083746	TCONS_00295486	AT1G07650	355
XLOC_083746	TCONS_00295488	AT1G29730	319
XLOC_083904	TCONS_00295756	AT5G41980	240
XLOC_083904	TCONS_00295759	AT5G41980	296
XLOC_083904	TCONS_00295760	AT5G41980	298
XLOC_083904	TCONS_00295761	AT5G41980	223
XLOC_083904	TCONS_00295762	AT5G41980	240
XLOC_083963	TCONS_00295855	AT5G08450	130
XLOC_083963	TCONS_00295856	AT5G08450	211
XLOC_084018	TCONS_00296111	AT1G07650	119
XLOC_084018	TCONS_00296113	AT1G07650	118
XLOC_084018	TCONS_00296115	AT1G07650	117
XLOC_084018	TCONS_00296119	AT1G07650	117
XLOC_084030	TCONS_00296143	AT1G07650	135
XLOC_084030	TCONS_00296149	AT1G07650	135
XLOC_084058	TCONS_00296225	AT2G20142	52.4
XLOC_084317	TCONS_00296583	AT4G34135	102
XLOC_084317	TCONS_00296585	AT4G34135	64.3
XLOC_084555	TCONS_00296892	AT1G01650	59.7
XLOC_085057	TCONS_00297646	AT4G03230	104
XLOC_085068	TCONS_00297662	AT4G15940	57.8
XLOC_086131	TCONS_00299443	AT2G01021	44.7
XLOC_086131	TCONS_00299447	AT2G01021	43.9
XLOC_086186	TCONS_00299518	AT2G01021	44.3
XLOC_086186	TCONS_00299521	AT2G01021	44.3
XLOC_086186	TCONS_00299522	AT2G01021	44.3
XLOC_086199	TCONS_00299536	AT2G01021	44.7
XLOC_086199	TCONS_00299537	AT2G01021	44.7
XLOC_086199	TCONS_00299539	AT2G01021	44.7
XLOC_086199	TCONS_00299541	AT2G01021	44.7
XLOC_086199	TCONS_00299542	AT2G01021	44.7
XLOC_086217	TCONS_00299570	AT2G01021	44.7
XLOC_086217	TCONS_00299575	AT2G01021	44.7
XLOC_086217	TCONS_00299580	AT2G01021	43.5
XLOC_086344	TCONS_00299844	AT5G27550	282
XLOC_086344	TCONS_00299846	AT5G27550	282
XLOC_086344	TCONS_00299848	AT5G27550	214
XLOC_086344	TCONS_00299849	AT5G27550	309
XLOC_086344	TCONS_00299850	AT5G27550	229
XLOC_086344	TCONS_00299853	AT5G27550	291
XLOC_087013	TCONS_00301010	AT2G33840	220
XLOC_087276	TCONS_00301342	AT3G02580	178
XLOC_087877	TCONS_00302282	AT3G13930	313
XLOC_088373	TCONS_00303032	AT2G26890	60.8
XLOC_088384	TCONS_00303047	AT1G08510	88.2
XLOC_088520	TCONS_00303260	ATCG00280	193

## Sheet: pfamscan results
# pfam_scan.pl, run at Mon Jun 3 22:08:49 2019
#
# Copyright (c) 2009 Genome Research Ltd
# Freely distributed under the GNU
# General Public License
#
# Authors: Jaina Mistry (jaina@ebi.ac.uk),
# Rob Finn (rdf@ebi.ac.uk)
#
# This is free software; you can redistribute it and/or modify it under
# the terms of the GNU General Public License as published by the Free Software
# Foundation; either version 2 of the License, or (at your option) any later version.
# This program is distributed in the hope that it will be useful, but WITHOUT
# ANY WARRANTY; without even the implied warranty of MERCHANTABILITY or FITNESS
# FOR A PARTICULAR PURPOSE. See the GNU General Public License for more
# details.
#
# You should have received a copy of the GNU General Public License along with
# this program. If not, see <http://www.gnu.org/licenses/>.
# = = = = = = = = = = = = = = = = = = = = = = = = = = = = = = = = = = = = = = = =
# query sequence file: three_geno_filt.fa.transdecoder.pep.clean.complete
# cpu number specified: 2
# searching against: ./Pfam-A.hmm, with cut off --cut_ga
# resolve clan overlaps: on
# predict active sites: off
# = = = = = = = = = = = = = = = = = = = = = = = = = = = = = = = = = = = = = = = =
#
# <seq id> <alignment start> <alignment end> <envelope start> <envelope end> <hmm acc> <hmm name> <type> <hmm start> <hmm end> <hmm length> <bit score> <E-value> <significance> <clan>
TCONS_00018936	92	157	73	160	PF13966.4	zf-RVT	Domain	18	81	85	55.9	5.1e-15
TCONS_00027704	97	195	96	195	PF03732.15	Retrotrans_gag	Family	2	96	97	54.9	7.8e-15
TCONS_00036766	174	339	174	339	PF13359.4	DDE_Tnp_4	Domain	1	158	158	71	8.4e-20
TCONS_00036767	182	347	182	347	PF13359.4	DDE_Tnp_4	Domain	1	158	158	71	8.9e-20
TCONS_00036769	21	186	21	186	PF13359.4	DDE_Tnp_4	Domain	1	158	158	72.9	2.2e-20
TCONS_00050128	4	97	1	97	PF13519.4	VWA_2	Domain	19	107	107	52.2	7.9e-14
TCONS_00077947	224	386	224	386	PF13359.4	DDE_Tnp_4	Domain	1	158	158	68.8	4.1e-19
TCONS_00077948	2	126	1	126	PF13359.4	DDE_Tnp_4	Domain	42	158	158	53.9	1.5e-14
TCONS_00077949	5	45	2	45	PF13359.4	DDE_Tnp_4	Domain	116	158	158	30	3.5e-07
TCONS_00078355	81	218	81	219	PF14223.4	Retrotran_gag_2	Family	1	137	140	67.4	1e-18
TCONS_00081525	59	127	59	127	PF13976.4	gag_pre-integrs	Domain	1	67	67	30.2	3e-07
TCONS_00103098	65	203	63	205	PF14223.4	Retrotran_gag_2	Family	3	136	140	79.5	1.8e-22
TCONS_00103098	248	263	247	264	PF00098.21	zf-CCHC	Domain	2	17	18	19.4	0.00078
TCONS_00103098	411	475	404	475	PF13976.4	gag_pre-integrs	Domain	6	67	67	49.6	2.5e-13
TCONS_00107789	305	462	305	462	PF13359.4	DDE_Tnp_4	Domain	1	158	158	121.8	2e-35
TCONS_00120518	159	386	156	386	PF00078.25	RVT_1	Family	13	222	222	34.4	1.6e-08
TCONS_00127393	2	158	1	158	PF13359.4	DDE_Tnp_4	Domain	2	158	158	128.2	2.2e-37
TCONS_00142249	8	42	2	44	PF12861.5	zf-ANAPC11	Family	46	82	85	21.5	0.00018
TCONS_00142249	185	368	185	369	PF00092.26	VWA	Domain	1	174	175	91.1	9.2e-26
TCONS_00142249	535	607	535	608	PF14624.4	Vwaint	Domain	1	69	70	77.3	7.3e-22
TCONS_00159500	71	100	70	100	PF17123.3	zf-RING_11	Domain	2	29	29	38.3	7.8e-10
TCONS_00159500	272	416	267	417	PF00092.26	VWA	Domain	45	174	175	44.8	1.6e-11
TCONS_00159500	584	656	584	657	PF14624.4	Vwaint	Domain	1	69	70	78.5	3e-22
TCONS_00159501	70	101	58	101	PF12678.5	zf-rbx1	Domain	25	55	55	32.5	7.9e-08
TCONS_00159501	251	434	251	435	PF00092.26	VWA	Domain	1	174	175	89.8	2.3e-25
TCONS_00159501	602	674	602	675	PF14624.4	Vwaint	Domain	1	69	70	78.5	3.1e-22
TCONS_00163277	226	388	226	388	PF13359.4	DDE_Tnp_4	Domain	1	158	158	69.9	1.8e-19
TCONS_00173870	161	235	160	236	PF03732.15	Retrotrans_gag	Family	2	74	97	41.3	1.4e-10
TCONS_00182335	4	82	4	82	PF13963.4	Transpos_assoc	Domain	1	74	76	80.1	1.1e-22
TCONS_00182335	302	344	302	344	PF02992.12	Transposase_21	Family	1	43	224	52	5.3e-14
TCONS_00188448	2	78	1	90	PF07714.15	Pkinase_Tyr	Domain	136	214	260	47.7	1.2e-12
TCONS_00191275	4	42	1	44	PF12861.5	zf-ANAPC11	Family	42	82	85	23.7	3.6e-05
TCONS_00191275	471	543	471	544	PF14624.4	Vwaint	Domain	1	69	70	74.1	7.4e-21
TCONS_00191276	441	513	441	514	PF14624.4	Vwaint	Domain	1	69	70	74.2	6.9e-21
TCONS_00210653	10	153	5	153	PF13359.4	DDE_Tnp_4	Domain	21	158	158	59.7	2.6e-16
TCONS_00221296	16	126	13	129	PF00665.24	rve	Domain	4	116	119	56.1	4e-15
TCONS_00221296	313	353	311	359	PF00385.22	Chromo	Domain	3	41	55	25.7	7.6e-06
TCONS_00221296	1	51	1	52	NULL	RT_RNaseH	NULL	54	104	0	40.8	2.1e-10
TCONS_00221296	141	182	138	182	NULL	Integrase_H2C2	NULL	4	43	0	32	9.8e-08
TCONS_00224496	96	269	94	270	PF04063.12	DUF383	Family	3	189	175	113.5	9.1e-33
TCONS_00224496	275	323	275	329	PF04064.11	DUF384	Family	1	49	55	26.3	4.8e-06
TCONS_00233557	193	262	172	262	PF05699.12	Dimer_Tnp_hAT	Domain	18	86	86	32.2	6.7e-08
TCONS_00245599	1	97	1	100	PF12313.6	NPR1_like_C	Family	33	131	205	109	2.2e-31
TCONS_00247909	164	312	152	312	PF13359.4	DDE_Tnp_4	Domain	13	158	158	59.7	2.6e-16
TCONS_00257247	2	140	1	163	PF00069.23	Pkinase	Domain	81	212	264	89.5	2.2e-25
TCONS_00257253	2	192	1	195	PF00069.23	Pkinase	Domain	81	259	264	95	4.6e-27
TCONS_00266196	2	176	1	177	PF00384.20	Molybdopterin	Family	129	397	432	99.1	2.8e-28
TCONS_00270003	15	107	15	109	PF12776.5	Myb_DNA-bind_3	Domain	1	94	96	64	1.9e-17
TCONS_00271314	49	182	47	241	PF03004.12	Transposase_24	Family	3	135	142	56	4.4e-15
TCONS_00271317	186	319	184	326	PF03004.12	Transposase_24	Family	3	135	142	55.2	8.2e-15
TCONS_00271318	135	203	135	214	PF13952.4	DUF4216	Domain	1	67	70	60.5	1.5e-16
TCONS_00273806	312	468	311	468	PF13359.4	DDE_Tnp_4	Domain	2	158	158	121.1	3.3e-35
TCONS_00279654	298	454	297	454	PF13359.4	DDE_Tnp_4	Domain	2	158	158	122.6	1.1e-35
TCONS_00281754	226	369	222	369	PF13359.4	DDE_Tnp_4	Domain	29	158	158	68.2	6e-19
TCONS_00292455	59	81	58	89	PF12854.5	PPR_1	Repeat	2	24	34	27.1	2.5e-06
TCONS_00292455	94	124	93	124	PF12854.5	PPR_1	Repeat	2	32	34	44.9	6.6e-12
TCONS_00293277	226	369	222	369	PF13359.4	DDE_Tnp_4	Domain	29	158	158	69.2	3.1e-19
TCONS_00294717	31	142	30	151	PF02788.14	RuBisCO_large_N	Domain	2	111	120	122.6	9.5e-36
TCONS_00295756	187	297	174	297	PF13359.4	DDE_Tnp_4	Domain	63	158	158	39.8	3.5e-10
TCONS_00295759	163	326	163	326	PF13359.4	DDE_Tnp_4	Domain	1	158	158	73.4	1.6e-20
TCONS_00295760	272	435	272	435	PF13359.4	DDE_Tnp_4	Domain	1	158	158	72.7	2.6e-20
TCONS_00295761	221	304	211	304	PF13359.4	DDE_Tnp_4	Domain	83	158	158	29.1	6.6e-07
TCONS_00295762	202	312	189	312	PF13359.4	DDE_Tnp_4	Domain	63	158	158	39.7	3.8e-10
TCONS_00295786	39	98	38	98	PF16188.3	Peptidase_M24_C	Domain	2	63	63	76.8	9.4e-22
TCONS_00296133	31	88	30	89	PF13855.4	LRR_8	Repeat	2	59	61	39.9	2.6e-10
TCONS_00299844	1	106	1	107	PF00225.21	Kinesin	Domain	92	201	333	72	4e-20
TCONS_00299846	1	106	1	107	PF00225.21	Kinesin	Domain	92	201	333	72	4e-20
TCONS_00299848	1	106	1	107	PF00225.21	Kinesin	Domain	92	201	333	72	4e-20
TCONS_00299849	23	80	16	128	PF00225.21	Kinesin	Domain	202	262	333	31.2	1e-07
TCONS_00299849	1	106	1	107	PF00225.21	Kinesin	Domain	92	201	333	72	4e-20
TCONS_00299850	1	106	1	107	PF00225.21	Kinesin	Domain	92	201	333	72	4e-20
TCONS_00299853	1	106	1	107	PF00225.21	Kinesin	Domain	92	201	333	72	4e-20
TCONS_00301010	3	127	2	134	PF00579.23	tRNA-synt_1b	Family	147	274	293	89.4	2.6e-25
