# Supplementary material for: The Genetic Regulation of Alternative Splicing in Populus deltoides
Source: Front Plant Sci. 2020 Jun 5;11:590. doi: 10.3389/fpls.2020.00590 (PMC7291814; doi:10.3389/fpls.2020.00590)
Supplement: TABLE S4 — DAVID enrichment clustering for Arabidopsis orthologs of Poplar genes with RNA recognition motif domains affected by AS. [file Table_4.XLSX]

## Sheet: shared_genes_dom_long_enrichmen
GO enrichment - molecular function
GO:0004611	0.0009111	4/345 | 7/19622	phosphoenolpyruvate carboxykinase activity
GO:0003676	0.02679	78/345 | 3014/19622	nucleic acid binding
GO:0004392	0.04402	2/345 | 3/19622	heme oxygenase (decyclizing) activity
GO:0004612	0.04454	2/345 | 2/19622	phosphoenolpyruvate carboxykinase (ATP) activity
Pfam enrichment
PF00076	4.499e-09	28/522 | 325/29014	RNA recognition motif. (a.k.a. RRM, RBD, or RNP domain)
PF02681	0.007777	3/522 | 7/29014	Divergent PAP2 family
PF01293	0.008723	2/522 | 2/29014	Phosphoenolpyruvate carboxykinase
PF01126	0.01939	2/522 | 3/29014	Heme oxygenase
PF01713	0.03066	2/522 | 4/29014	Smr domain
PF00560	0.03271	3/522 | 691/29014	Leucine Rich Repeat
PF07889	0.03401	2/522 | 6/29014	Protein of unknown function (DUF1664)
PF00326	0.03477	3/522 | 18/29014	Prolyl oligopeptidase family
PF00916	0.03548	3/522 | 20/29014	Sulfate transporter family
PF00311	0.03606	2/522 | 5/29014	Phosphoenolpyruvate carboxylase
PF03556	0.03742	2/522 | 6/29014	Domain of unknown function (DUF298)
PF01535	0.03743	2/522 | 607/29014	PPR repeat
PF08700	0.05776	2/522 | 9/29014	Vps51/Vps67
PF01433	0.06189	2/522 | 9/29014	Peptidase family M1
PF02096	0.06665	2/522 | 9/29014	60Kd inner membrane protein
PF00010	0.08693	7/522 | 173/29014	Helix-loop-helix DNA-binding domain
PF01426	0.08717	2/522 | 15/29014	BAH domain
PF01485	0.08757	2/522 | 17/29014	IBR domain
PF00067	0.08789	2/522 | 421/29014	Cytochrome P450
PF00097	0.08811	13/522 | 368/29014	Zinc finger, C3HC4 type (RING finger)
PF00227	0.08843	3/522 | 34/29014	Proteasome subunit
PF00903	0.08947	2/522 | 18/29014	Glyoxalase/Bleomycin resistance protein/Dioxygenase superfamily
PF00696	0.08951	2/522 | 13/29014	Amino acid kinase family
PF00180	0.08974	2/522 | 14/29014	Isocitrate/isopropylmalate dehydrogenase
PF04146	0.09023	2/522 | 17/29014	YT521-B-like family
PF03798	0.09052	2/522 | 15/29014	TLC domain
PF02714	0.09305	2/522 | 17/29014	Domain of unknown function DUF221
PF04784	0.09382	2/522 | 14/29014	Protein of unknown function, DUF547
PF00063	0.09414	2/522 | 15/29014	Myosin head (motor domain)
PF01467	0.09422	2/522 | 13/29014	Cytidylyltransferase
PF03016	0.09442	4/522 | 67/29014	Exostosin family
PF06200	0.09605	2/522 | 17/29014	tify domain
PF09335	0.09623	2/522 | 19/29014	SNARE associated Golgi protein
PF00574	0.09925	2/522 | 17/29014	Clp protease
PF01544	0.09945	2/522 | 13/29014	CorA-like Mg2+ transporter protein
KEGG enrichment
K01610	0.005972	2/153 | 2/5582	phosphoenolpyruvate carboxykinase (ATP) [EC:4.1.1.49]
K03217	0.01414	2/153 | 5/5582	preprotein translocase subunit YidC
K00031	0.01666	2/153 | 6/5582	isocitrate dehydrogenase [EC:1.1.1.42]
K06889	0.01728	2/153 | 4/5582	hemoglobin
K01595	0.01885	2/153 | 5/5582	phosphoenolpyruvate carboxylase [EC:4.1.1.31]
K01358	0.025	2/153 | 8/5582	ATP-dependent Clp protease, protease subunit [EC:3.4.21.92]

## Sheet: longest_enrichment
GO enrichment - molecular function
GO:0003676	0.02218	103/469 | 3014/19622	nucleic acid binding
Pfam enrichment
PF00076	8.528e-07	27/657 | 325/29014	RNA recognition motif. (a.k.a. RRM, RBD, or RNP domain)
PF01762	0.02458	4/657 | 20/29014	Galactosyltransferase
PF08555	0.02662	2/657 | 2/29014	Eukaryotic family of unknown function (DUF1754)
PF02309	0.03005	7/657 | 68/29014	AUX/IAA family
PF05030	0.04699	2/657 | 6/29014	SSXT protein (N-terminal region)
PF02234	0.04937	2/657 | 7/29014	Cyclin-dependent kinase inhibitor
PF00240	0.04939	7/657 | 103/29014	Ubiquitin family
PF05916	0.05012	2/657 | 6/29014	GINS complex subunit Sld5
PF07534	0.05184	2/657 | 7/29014	TLD
PF00560	0.05194	6/657 | 691/29014	Leucine Rich Repeat
PF00789	0.05228	3/657 | 19/29014	UBX domain
PF00366	0.0537	2/657 | 6/29014	Ribosomal protein S17
PF01048	0.05402	3/657 | 16/29014	Phosphorylase superfamily
PF02985	0.05487	4/657 | 33/29014	HEAT repeat
PF00781	0.05654	2/657 | 5/29014	Diacylglycerol kinase catalytic domain
PF00569	0.05783	2/657 | 6/29014	Zinc finger, ZZ type,
PF05577	0.05864	3/657 | 17/29014	Serine carboxypeptidase S28
PF00628	0.05942	5/657 | 62/29014	PHD-finger
PF01585	0.06078	3/657 | 23/29014	G-patch domain
PF05383	0.0619	2/657 | 8/29014	La domain
PF00270	0.06307	8/657 | 107/29014	DEAD/DEAH box helicase
PF01301	0.06331	3/657 | 23/29014	Glycosyl hydrolases family 35
PF08245	0.0636	2/657 | 5/29014	Mur ligase middle domain
PF00561	0.06627	7/657 | 116/29014	alpha/beta hydrolase fold
PF04734	0.07269	2/657 | 5/29014	Neutral/alkaline non-lysosomal ceramidase
PF03982	0.07325	2/657 | 10/29014	Diacylglycerol acyltransferase
PF02170	0.07439	3/657 | 15/29014	PAZ domain
PF00534	0.07472	4/657 | 47/29014	Glycosyl transferases group 1
PF01926	0.07575	3/657 | 27/29014	GTPase of unknown function
PF01852	0.07586	2/657 | 10/29014	START domain
PF04178	0.07867	2/657 | 10/29014	Got1/Sft2-like family
PF01535	0.08769	6/657 | 607/29014	PPR repeat
PF00447	0.09122	3/657 | 30/29014	HSF-type DNA-binding
PF00067	0.09338	3/657 | 421/29014	Cytochrome P450
PF00982	0.09516	2/657 | 13/29014	Glycosyltransferase family 20
PF00415	0.0965	3/657 | 31/29014	Regulator of chromosome condensation (RCC1) repeat
PF01467	0.0978	2/657 | 13/29014	Cytidylyltransferase
PF00514	0.09807	4/657 | 55/29014	Armadillo/beta-catenin-like repeat
KEGG enrichment
K11096	0.008091	2/178 | 2/5582	small nuclear ribonucleoprotein D2
K02987	0.01551	2/178 | 4/5582	small subunit ribosomal protein S4e
K01244	0.01618	2/178 | 2/5582	5'-methylthioadenosine nucleosidase [EC:3.2.2.16]
K11430	0.01861	2/178 | 4/5582	enhancer of zeste [EC:2.1.1.43]
K01265	0.02169	2/178 | 5/5582	methionyl aminopeptidase [EC:3.4.11.18]
K06889	0.02326	2/178 | 4/5582	hemoglobin
K00058	0.02478	2/178 | 6/5582	D-3-phosphoglycerate dehydrogenase [EC:1.1.1.95]
K11596	0.02788	2/178 | 6/5582	argonaute
K10999	0.03025	3/178 | 12/5582	cellulose synthase A [EC:2.4.1.12]
K14486	0.03629	2/178 | 8/5582	auxin response factor
K08081	0.03992	2/178 | 8/5582	tropine dehydrogenase [EC:1.1.1.206]
K14431	0.05127	2/178 | 10/5582	transcription factor TGA
K07975	0.07708	2/178 | 13/5582	Rho family, other
K09338	0.08533	3/178 | 31/5582	homeobox-leucine zipper protein
miRNA binding sites
ptc-miR166	0.07733	3/52 | 11/2200	Cleavage

## Sheet: dominant_enrichment
GO enrichment - biological processes
GO:0046907	0.001895	30/818 | 233/14903	intracellular transport
GO:0035556	0.002441	24/818 | 171/14903	intracellular signal transduction
GO:0051174	0.004284	14/818 | 75/14903	regulation of phosphorus metabolic process
GO:0019220	0.004284	14/818 | 75/14903	regulation of phosphate metabolic process
GO:0016192	0.004319	23/818 | 170/14903	vesicle-mediated transport
GO:0045184	0.004827	32/818 | 277/14903	establishment of protein localization
GO:0015031	0.004827	32/818 | 277/14903	protein transport
GO:0032312	0.004984	7/818 | 21/14903	regulation of ARF GTPase activity
GO:0051649	0.008771	30/818 | 267/14903	establishment of localization in cell
GO:0006886	0.008857	24/818 | 194/14903	intracellular protein transport
GO:0051603	0.0114	19/818 | 142/14903	proteolysis involved in cellular protein catabolic process
GO:0007264	0.0118	19/818 | 143/14903	small GTPase mediated signal transduction
GO:0051336	0.01185	10/818 | 49/14903	regulation of hydrolase activity
GO:0016482	0.0156	11/818 | 61/14903	cytoplasmic transport
GO:0032318	0.023	9/818 | 47/14903	regulation of Ras GTPase activity
GO:0030811	0.023	9/818 | 47/14903	regulation of nucleotide catabolic process
GO:1900542	0.023	9/818 | 47/14903	regulation of purine nucleotide metabolic process
GO:0043087	0.023	9/818 | 47/14903	regulation of GTPase activity
GO:0033121	0.023	9/818 | 47/14903	regulation of purine nucleotide catabolic process
GO:0033124	0.023	9/818 | 47/14903	regulation of GTP catabolic process
GO:0009118	0.023	9/818 | 47/14903	regulation of nucleoside metabolic process
GO:0031329	0.023	9/818 | 47/14903	regulation of cellular catabolic process
GO:0050794	0.02374	164/818 | 2362/14903	regulation of cellular process
GO:0072599	0.02562	5/818 | 16/14903	establishment of protein localization to endoplasmic reticulum
GO:0006612	0.02562	5/818 | 16/14903	protein targeting to membrane
GO:0006613	0.02562	5/818 | 16/14903	cotranslational protein targeting to membrane
GO:0006614	0.02562	5/818 | 16/14903	SRP-dependent cotranslational protein targeting to membrane
GO:0045047	0.02562	5/818 | 16/14903	protein targeting to ER
GO:0051726	0.02562	8/818 | 39/14903	regulation of cell cycle
GO:0006140	0.0283	9/818 | 49/14903	regulation of nucleotide metabolic process
GO:0009894	0.03366	9/818 | 52/14903	regulation of catabolic process
GO:0043632	0.03419	16/818 | 125/14903	modification-dependent macromolecule catabolic process
GO:0006511	0.03419	16/818 | 125/14903	ubiquitin-dependent protein catabolic process
GO:0019941	0.03419	16/818 | 125/14903	modification-dependent protein catabolic process
GO:0048193	0.03428	7/818 | 36/14903	Golgi vesicle transport
GO:0050789	0.03432	169/818 | 2481/14903	regulation of biological process
GO:0044265	0.03446	16/818 | 133/14903	cellular macromolecule catabolic process
GO:0033559	0.03476	2/818 | 2/14903	unsaturated fatty acid metabolic process
GO:1901568	0.03476	2/818 | 2/14903	fatty acid derivative metabolic process
GO:1901570	0.03476	2/818 | 2/14903	fatty acid derivative biosynthetic process
GO:0006691	0.03476	2/818 | 2/14903	leukotriene metabolic process
GO:0006000	0.03476	2/818 | 2/14903	fructose metabolic process
GO:0006003	0.03476	2/818 | 2/14903	fructose 2,6-bisphosphate metabolic process
GO:0019370	0.03476	2/818 | 2/14903	leukotriene biosynthetic process
GO:0006636	0.03476	2/818 | 2/14903	unsaturated fatty acid biosynthetic process
GO:0006690	0.03476	2/818 | 2/14903	icosanoid metabolic process
GO:0046456	0.03476	2/818 | 2/14903	icosanoid biosynthetic process
GO:0065007	0.03714	170/818 | 2505/14903	biological regulation
GO:0000160	0.04057	12/818 | 87/14903	phosphorelay signal transduction system
GO:0048523	0.04161	5/818 | 19/14903	negative regulation of cellular process
GO:0006470	0.04163	6/818 | 27/14903	protein dephosphorylation
GO:0006564	0.04198	3/818 | 6/14903	L-serine biosynthetic process
GO:0016311	0.04658	6/818 | 29/14903	dephosphorylation
GO:0006508	0.0496	55/818 | 689/14903	proteolysis
GO:0007050	0.04975	3/818 | 7/14903	cell cycle arrest
GO:0045786	0.04975	3/818 | 7/14903	negative regulation of cell cycle
GO enrichment - molecular function
GO:0005515	4.422e-07	318/1109 | 4123/19622	protein binding
GO:0005488	5.666e-07	785/1109 | 12290/19622	binding
GO:0008270	3.318e-06	85/1109 | 814/19622	zinc ion binding
GO:0005525	0.001888	37/1109 | 321/19622	GTP binding
GO:0032561	0.001888	37/1109 | 321/19622	guanyl ribonucleotide binding
GO:0003676	0.002285	219/1109 | 3014/19622	nucleic acid binding
GO:0019001	0.003389	37/1109 | 329/19622	guanyl nucleotide binding
GO:0008060	0.003784	7/1109 | 21/19622	ARF GTPase activator activity
GO:0000156	0.0129	12/1109 | 70/19622	phosphorelay response regulator activity
GO:0004721	0.02173	7/1109 | 29/19622	phosphoprotein phosphatase activity
GO:0016791	0.02206	10/1109 | 55/19622	phosphatase activity
GO:0005096	0.02347	9/1109 | 47/19622	GTPase activator activity
GO:0008138	0.02421	6/1109 | 22/19622	protein tyrosine/serine/threonine phosphatase activity
GO:0016853	0.03026	21/1109 | 178/19622	isomerase activity
GO:0000989	0.03202	8/1109 | 41/19622	transcription factor binding transcription factor activity
GO:0003712	0.03202	8/1109 | 41/19622	transcription cofactor activity
GO:0000988	0.03296	9/1109 | 50/19622	protein binding transcription factor activity
GO:0003924	0.0353	21/1109 | 185/19622	GTPase activity
GO:0005516	0.03901	7/1109 | 34/19622	calmodulin binding
GO:0070003	0.03901	7/1109 | 34/19622	threonine-type peptidase activity
GO:0004298	0.03901	7/1109 | 34/19622	threonine-type endopeptidase activity
GO:0008047	0.03979	9/1109 | 53/19622	enzyme activator activity
GO:0005047	0.04267	2/1109 | 2/19622	signal recognition particle binding
GO:0003873	0.04267	2/1109 | 2/19622	6-phosphofructo-2-kinase activity
GO:0004617	0.04466	3/1109 | 6/19622	phosphoglycerate dehydrogenase activity
GO:0008289	0.0458	12/1109 | 87/19622	lipid binding
GO enrichment - cellular component
GO:0005634	0.001592	85/369 | 886/6017	nucleus
GO:0043229	0.01453	126/369 | 1580/6017	intracellular organelle
GO:0043226	0.01453	126/369 | 1580/6017	organelle
GO:0043227	0.01542	91/369 | 1054/6017	membrane-bounded organelle
GO:0043231	0.01542	91/369 | 1054/6017	intracellular membrane-bounded organelle
GO:0030117	0.0378	9/369 | 48/6017	membrane coat
GO:0044424	0.03781	197/369 | 2754/6017	intracellular part
GO:0044464	0.03869	252/369 | 3667/6017	cell part
GO:0005839	0.04273	7/369 | 34/6017	proteasome core complex
GO:0005785	0.04502	2/369 | 2/6017	signal recognition particle receptor complex
Pfam enrichment
PF00515	1.142e-08	21/1504 | 67/29014	Tetratricopeptide repeat
PF00076	1.489e-08	50/1504 | 325/29014	RNA recognition motif. (a.k.a. RRM, RBD, or RNP domain)
PF01535	5.187e-05	8/1504 | 607/29014	PPR repeat
PF00067	0.0002343	4/1504 | 421/29014	Cytochrome P450
PF00931	0.0003935	3/1504 | 370/29014	NB-ARC domain
PF02225	0.0009457	6/1504 | 13/29014	PA domain
PF08700	0.00116	5/1504 | 9/29014	Vps51/Vps67
PF00023	0.00122	21/1504 | 151/29014	Ankyrin repeat
PF00240	0.002067	16/1504 | 103/29014	Ubiquitin family
PF00072	0.00553	12/1504 | 70/29014	Response regulator receiver domain
PF00782	0.0114	6/1504 | 21/29014	Dual specificity phosphatase, catalytic domain
PF00620	0.01444	4/1504 | 9/29014	RhoGAP domain
PF00560	0.01919	18/1504 | 691/29014	Leucine Rich Repeat
PF00046	0.01925	16/1504 | 129/29014	Homeobox domain
PF00448	0.01979	4/1504 | 10/29014	SRP54-type protein, GTPase domain
PF00957	0.02009	5/1504 | 17/29014	Synaptobrevin
PF00227	0.02156	7/1504 | 34/29014	Proteasome subunit
PF00149	0.02303	11/1504 | 80/29014	Calcineurin-like phosphoesterase
PF04379	0.02347	2/1504 | 2/29014	Protein of unknown function (DUF525)
PF00326	0.02368	5/1504 | 18/29014	Prolyl oligopeptidase family
PF08265	0.02438	2/1504 | 2/29014	YL1 nuclear protein C-terminal domain
PF08555	0.02535	2/1504 | 2/29014	Eukaryotic family of unknown function (DUF1754)
PF04062	0.02641	2/1504 | 2/29014	ARP2/3 complex ARPC3 (21 kDa) subunit
PF04065	0.02755	2/1504 | 2/29014	Not1 N-terminal domain, CCR4-Not complex component
PF09713	0.0286	4/1504 | 12/29014	Plant protein 1589 of unknown function (A_thal_3526)
PF04048	0.02881	2/1504 | 2/29014	Sec8 exocyst complex component specific domain
PF01851	0.02915	3/1504 | 6/29014	Proteasome/cyclosome repeat
PF05030	0.03068	3/1504 | 6/29014	SSXT protein (N-terminal region)
PF02463	0.03164	3/1504 | 7/29014	RecF/RecN/SMC N terminal domain
PF02234	0.0327	3/1504 | 7/29014	Cyclin-dependent kinase inhibitor
PF00400	0.03305	28/1504 | 312/29014	WD domain, G-beta repeat
PF00595	0.03382	3/1504 | 7/29014	PDZ domain (Also known as DHR or GLGF)
PF00255	0.04439	3/1504 | 8/29014	Glutathione peroxidase
PF00071	0.04468	11/1504 | 89/29014	Ras family
PF01090	0.04831	2/1504 | 3/29014	Ribosomal protein S19e
PF06058	0.04961	2/1504 | 3/29014	Dcp1-like decapping family
PF02854	0.05099	2/1504 | 3/29014	MIF4G domain
PF05116	0.05245	2/1504 | 3/29014	Sucrose-6F-phosphate phosphohydrolase
PF07724	0.05443	3/1504 | 9/29014	AAA domain (Cdc48 subfamily)
PF00561	0.05569	13/1504 | 116/29014	alpha/beta hydrolase fold
PF00505	0.05725	4/1504 | 17/29014	HMG (high mobility group) box
PF00847	0.06141	3/1504 | 209/29014	AP2 domain
PF01529	0.0616	6/1504 | 37/29014	DHHC zinc finger domain
PF00389	0.06582	4/1504 | 18/29014	D-isomer specific 2-hydroxyacid dehydrogenase, catalytic domain
PF04178	0.06647	3/1504 | 10/29014	Got1/Sft2-like family
PF01713	0.06818	2/1504 | 4/29014	Smr domain
PF05175	0.06951	2/1504 | 4/29014	Methyltransferase small domain
PF01975	0.0709	2/1504 | 4/29014	Survival protein SurE
PF04774	0.07235	2/1504 | 4/29014	Hyaluronan / mRNA binding family
PF00637	0.07327	3/1504 | 11/29014	Region in Clathrin and VPS
PF00628	0.07375	8/1504 | 62/29014	PHD-finger
PF01805	0.07386	2/1504 | 4/29014	Surp module
PF00675	0.07465	3/1504 | 11/29014	Insulinase (Peptidase family M16)
PF00581	0.07491	4/1504 | 19/29014	Rhodanese-like domain
PF01762	0.0768	4/1504 | 20/29014	Galactosyltransferase
PF00428	0.08904	3/1504 | 12/29014	60s Acidic ribosomal protein
PF02847	0.09063	3/1504 | 12/29014	MA3 domain
PF00120	0.092	3/1504 | 13/29014	Glutamine synthetase, catalytic domain
PF00408	0.09204	2/1504 | 5/29014	Phosphoglucomutase/phosphomannomutase, C-terminal domain
PF00443	0.0922	6/1504 | 43/29014	Ubiquitin carboxyl-terminal hydrolase
PF00535	0.09328	4/1504 | 22/29014	Glycosyl transferase family 2
PF01412	0.09336	3/1504 | 13/29014	Putative GTPase activating protein for Arf
PF00781	0.09355	2/1504 | 5/29014	Diacylglycerol kinase catalytic domain
PF00787	0.09475	3/1504 | 13/29014	PX domain
PF08245	0.09511	2/1504 | 5/29014	Mur ligase middle domain
PF02985	0.09564	5/1504 | 33/29014	HEAT repeat
PF01544	0.09618	3/1504 | 13/29014	CorA-like Mg2+ transporter protein
PF01585	0.09619	4/1504 | 23/29014	G-patch domain
PF04734	0.09672	2/1504 | 5/29014	Neutral/alkaline non-lysosomal ceramidase
PF00270	0.09696	11/1504 | 107/29014	DEAD/DEAH box helicase
PF00169	0.09757	4/1504 | 23/29014	PH domain
KEGG enrichment
K06268	0.01162	5/464 | 8/5582	protein phosphatase 3, regulatory subunit
K07432	0.02395	2/464 | 2/5582	beta-1,4-N-acetylglucosaminyltransferase [EC:2.4.1.141]
K13431	0.02529	2/464 | 2/5582	signal recognition particle receptor subunit alpha
K10661	0.02677	2/464 | 2/5582	E3 ubiquitin-protein ligase MARCH6 [EC:6.3.2.19]
K11366	0.02845	2/464 | 2/5582	ubiquitin carboxyl-terminal hydrolase 22/27/51 [EC:3.1.2.15]
K00058	0.02965	3/464 | 6/5582	D-3-phosphoglycerate dehydrogenase [EC:1.1.1.95]
K10688	0.03034	2/464 | 2/5582	ubiquitin-conjugating enzyme E2 W [EC:6.3.2.19]
K00432	0.03113	3/464 | 6/5582	glutathione peroxidase [EC:1.11.1.9]
K12580	0.03251	2/464 | 2/5582	CCR4-NOT transcription complex subunit 3
K01254	0.03501	2/464 | 2/5582	leukotriene-A4 hydrolase [EC:3.3.2.6]
K09338	0.03567	7/464 | 31/5582	homeobox-leucine zipper protein
K01244	0.03793	2/464 | 2/5582	5'-methylthioadenosine nucleosidase [EC:3.2.2.16]
K11843	0.04138	2/464 | 2/5582	ubiquitin carboxyl-terminal hydrolase 14 [EC:3.1.2.15]
K02218	0.04161	2/464 | 3/5582	casein kinase 1 [EC:2.7.11.1]
K02966	0.043	2/464 | 3/5582	small subunit ribosomal protein S19e
K04382	0.04447	3/464 | 7/5582	protein phosphatase 2 (formerly 2A), catalytic subunit [EC:3.1.3.16]
K02941	0.04448	2/464 | 3/5582	large subunit ribosomal protein LP0
K07910	0.04551	2/464 | 2/5582	Ras-related protein Rab-18
K12448	0.04607	2/464 | 3/5582	UDP-arabinose 4-epimerase [EC:5.1.3.5]
K06892	0.04778	2/464 | 3/5582	ATP-dependent Clp protease adaptor protein ClpS
K00083	0.04962	2/464 | 3/5582	cinnamyl-alcohol dehydrogenase [EC:1.1.1.195]
K09584	0.05057	2/464 | 2/5582	protein disulfide-isomerase A6 [EC:5.3.4.1]
K10144	0.0516	2/464 | 3/5582	ring finger and CHY zinc finger domain-containing protein 1
K02730	0.05375	2/464 | 3/5582	20S proteasome subunit alpha 1 [EC:3.4.25.1]
K06111	0.05689	2/464 | 2/5582	exocyst complex component 4
K00888	0.05948	2/464 | 4/5582	phosphatidylinositol 4-kinase [EC:2.7.1.67]
K01835	0.06097	2/464 | 4/5582	phosphoglucomutase [EC:5.4.2.2]
K08515	0.06253	2/464 | 4/5582	vesicle-associated membrane protein 7
K10956	0.06418	2/464 | 4/5582	protein transport protein SEC61 subunit alpha
K11096	0.06502	2/464 | 2/5582	small nuclear ribonucleoprotein D2
K02987	0.06591	2/464 | 4/5582	small subunit ribosomal protein S4e
K06889	0.06774	2/464 | 4/5582	hemoglobin
K03787	0.06968	2/464 | 4/5582	5'-nucleotidase [EC:3.1.3.5]
K01533	0.07173	2/464 | 4/5582	Cu2+-exporting ATPase [EC:3.6.3.4]
K13525	0.0739	2/464 | 4/5582	transitional endoplasmic reticulum ATPase
K03032	0.07586	2/464 | 2/5582	26S proteasome regulatory subunit N2
K02908	0.07621	2/464 | 4/5582	large subunit ribosomal protein L30e
K14396	0.08177	2/464 | 5/5582	polyadenylate-binding protein 2
K08081	0.08305	4/464 | 8/5582	tropine dehydrogenase [EC:1.1.1.206]
K09284	0.08355	2/464 | 5/5582	AP2-like factor, euAP2 lineage
K01915	0.08541	2/464 | 5/5582	glutamine synthetase [EC:6.3.1.2]
K01265	0.08735	2/464 | 5/5582	methionyl aminopeptidase [EC:3.4.11.18]
K01792	0.08938	2/464 | 5/5582	glucose-6-phosphate 1-epimerase [EC:5.1.3.15]
K03875	0.09103	2/464 | 2/5582	F-box and leucine-rich repeat protein 1 (S-phase kinase-associated protein 2)
K01412	0.09151	2/464 | 5/5582	mitochondrial processing peptidase [EC:3.4.24.64]
K10999	0.09814	3/464 | 12/5582	cellulose synthase A [EC:2.4.1.12]
miRNA binding sites
ptc-miR166	0.01457	5/125 | 11/2200	Cleavage
