# Supplementary material for: The Genetic Regulation of Alternative Splicing in Populus deltoides
Source: Front Plant Sci. 2020 Jun 5;11:590. doi: 10.3389/fpls.2020.00590 (PMC7291814; doi:10.3389/fpls.2020.00590)
Supplement: TABLE S7 — DAVID enrichment clustering for Arabidopsis orthologs of Poplar genes with RNA recognition motif domains that had miRNA binding site gain/loss affected by AS. [file Table_7.XLSX]

## Sheet: dom_long_shared_enrichment
GO enrichment - molecular function
GO:0004611	0.0009111	4/345 | 7/19622	phosphoenolpyruvate carboxykinase activity
GO:0003676	0.02679	78/345 | 3014/19622	nucleic acid binding
GO:0004392	0.04402	2/345 | 3/19622	heme oxygenase (decyclizing) activity
GO:0004612	0.04454	2/345 | 2/19622	phosphoenolpyruvate carboxykinase (ATP) activity
Pfam enrichment
PF00076	4.499e-09	28/522 | 325/29014	RNA recognition motif. (a.k.a. RRM, RBD, or RNP domain)
PF02681	0.007777	3/522 | 7/29014	Divergent PAP2 family
PF01293	0.008723	2/522 | 2/29014	Phosphoenolpyruvate carboxykinase
PF01126	0.01939	2/522 | 3/29014	Heme oxygenase
PF01713	0.03066	2/522 | 4/29014	Smr domain
PF00560	0.03271	3/522 | 691/29014	Leucine Rich Repeat
PF07889	0.03401	2/522 | 6/29014	Protein of unknown function (DUF1664)
PF00326	0.03477	3/522 | 18/29014	Prolyl oligopeptidase family
PF00916	0.03548	3/522 | 20/29014	Sulfate transporter family
PF00311	0.03606	2/522 | 5/29014	Phosphoenolpyruvate carboxylase
PF03556	0.03742	2/522 | 6/29014	Domain of unknown function (DUF298)
PF01535	0.03743	2/522 | 607/29014	PPR repeat
PF08700	0.05776	2/522 | 9/29014	Vps51/Vps67
PF01433	0.06189	2/522 | 9/29014	Peptidase family M1
PF02096	0.06665	2/522 | 9/29014	60Kd inner membrane protein
PF00010	0.08693	7/522 | 173/29014	Helix-loop-helix DNA-binding domain
PF01426	0.08717	2/522 | 15/29014	BAH domain
PF01485	0.08757	2/522 | 17/29014	IBR domain
PF00067	0.08789	2/522 | 421/29014	Cytochrome P450
PF00097	0.08811	13/522 | 368/29014	Zinc finger, C3HC4 type (RING finger)
PF00227	0.08843	3/522 | 34/29014	Proteasome subunit
PF00903	0.08947	2/522 | 18/29014	Glyoxalase/Bleomycin resistance protein/Dioxygenase superfamily
PF00696	0.08951	2/522 | 13/29014	Amino acid kinase family
PF00180	0.08974	2/522 | 14/29014	Isocitrate/isopropylmalate dehydrogenase
PF04146	0.09023	2/522 | 17/29014	YT521-B-like family
PF03798	0.09052	2/522 | 15/29014	TLC domain
PF02714	0.09305	2/522 | 17/29014	Domain of unknown function DUF221
PF04784	0.09382	2/522 | 14/29014	Protein of unknown function, DUF547
PF00063	0.09414	2/522 | 15/29014	Myosin head (motor domain)
PF01467	0.09422	2/522 | 13/29014	Cytidylyltransferase
PF03016	0.09442	4/522 | 67/29014	Exostosin family
PF06200	0.09605	2/522 | 17/29014	tify domain
PF09335	0.09623	2/522 | 19/29014	SNARE associated Golgi protein
PF00574	0.09925	2/522 | 17/29014	Clp protease
PF01544	0.09945	2/522 | 13/29014	CorA-like Mg2+ transporter protein
KEGG enrichment
K01610	0.005972	2/153 | 2/5582	phosphoenolpyruvate carboxykinase (ATP) [EC:4.1.1.49]
K03217	0.01414	2/153 | 5/5582	preprotein translocase subunit YidC
K00031	0.01666	2/153 | 6/5582	isocitrate dehydrogenase [EC:1.1.1.42]
K06889	0.01728	2/153 | 4/5582	hemoglobin
K01595	0.01885	2/153 | 5/5582	phosphoenolpyruvate carboxylase [EC:4.1.1.31]
K01358	0.025	2/153 | 8/5582	ATP-dependent Clp protease, protease subunit [EC:3.4.21.92]

## Sheet: longest_enrichment
GO enrichment - biological processes
GO:0046907	0.03906	13/280 | 233/14903	intracellular transport
GO enrichment - Molecular Function
GO:0004611	0.002308	4/426 | 7/19622	phosphoenolpyruvate carboxykinase activity
GO:0003676	0.008014	96/426 | 3014/19622	nucleic acid binding
GO:0004612	0.01863	2/426 | 2/19622	phosphoenolpyruvate carboxykinase (ATP) activity
GO:0004392	0.04897	2/426 | 3/19622	heme oxygenase (decyclizing) activity
Pfam enrichment
PF00076	4.729e-09	32/637 | 325/29014	RNA recognition motif. (a.k.a. RRM, RBD, or RNP domain)
PF01535	0.01174	2/637 | 607/29014	PPR repeat
PF02681	0.01196	3/637 | 7/29014	Divergent PAP2 family
PF01293	0.01251	2/637 | 2/29014	Phosphoenolpyruvate carboxykinase
PF01126	0.02466	2/637 | 3/29014	Heme oxygenase
PF00560	0.02857	4/637 | 691/29014	Leucine Rich Repeat
PF01713	0.0324	2/637 | 4/29014	Smr domain
PF00982	0.03323	3/637 | 13/29014	Glycosyltransferase family 20
PF01467	0.03797	3/637 | 13/29014	Cytidylyltransferase
PF07889	0.0472	2/637 | 6/29014	Protein of unknown function (DUF1664)
PF00311	0.0479	2/637 | 5/29014	Phosphoenolpyruvate carboxylase
PF06200	0.04934	3/637 | 17/29014	tify domain
PF03556	0.05057	2/637 | 6/29014	Domain of unknown function (DUF298)
PF09335	0.05104	3/637 | 19/29014	SNARE associated Golgi protein
PF00642	0.05373	4/637 | 33/29014	Zinc finger C-x8-C-x5-C-x3-H type (and similar)
PF00326	0.05377	3/637 | 18/29014	Prolyl oligopeptidase family
PF00916	0.05561	3/637 | 20/29014	Sulfate transporter family
PF00067	0.05756	2/637 | 421/29014	Cytochrome P450
PF00097	0.05992	16/637 | 368/29014	Zinc finger, C3HC4 type (RING finger)
PF08700	0.07072	2/637 | 9/29014	Vps51/Vps67
PF01918	0.07394	2/637 | 9/29014	Alba
PF02096	0.07746	2/637 | 9/29014	60Kd inner membrane protein
PF01433	0.08133	2/637 | 9/29014	Peptidase family M1
PF00503	0.0835	2/637 | 10/29014	G-protein alpha subunit
PF08449	0.09285	2/637 | 11/29014	UAA transporter family
PF03105	0.0955	3/637 | 28/29014	SPX domain
KEGG enrichment
K01610	0.01176	2/183 | 2/5582	phosphoenolpyruvate carboxykinase (ATP) [EC:4.1.1.49]
K12890	0.02203	2/183 | 5/5582	splicing factor, arginine/serine-rich 1/9
K00031	0.02695	2/183 | 6/5582	isocitrate dehydrogenase [EC:1.1.1.42]
K03217	0.02754	2/183 | 5/5582	preprotein translocase subunit YidC
K06889	0.03377	2/183 | 4/5582	hemoglobin
K01358	0.03613	2/183 | 8/5582	ATP-dependent Clp protease, protease subunit [EC:3.4.21.92]
K01595	0.03672	2/183 | 5/5582	phosphoenolpyruvate carboxylase [EC:4.1.1.31]
K01904	0.04129	2/183 | 8/5582	4-coumarate--CoA ligase [EC:6.2.1.12]
miRNA binding site enrichment
ptc-miR169	0.6629	6/100 | 57/2200	Cleavage
ptc-miR6469	0.7532	2/100 | 9/2200	Cleavage
ptc-miR166	0.7751	2/100 | 11/2200	Cleavage
ptc-miR168	0.8027	1/100 | 17/2200	Translation
ptc-miR408	0.814	1/100 | 20/2200	Cleavage
ptc-miR6480	0.8182	1/100 | 12/2200	Cleavage
ptc-miR7823	0.8183	3/100 | 17/2200	Cleavage
ptc-miR482	0.8186	3/100 | 100/2200	Translation
ptc-miR398	0.8218	1/100 | 17/2200	Translation
ptc-miR167	0.829	3/100 | 28/2200	Cleavage
ptc-miR6438	0.8316	1/100 | 20/2200	Translation
ptc-miR7813	0.8347	1/100 | 15/2200	Cleavage
ptc-miR6461	0.8385	2/100 | 15/2200	Cleavage
ptc-miR390	0.8418	2/100 | 32/2200	Cleavage
ptc-miR395	0.8419	1/100 | 17/2200	Cleavage
ptc-miR7819	0.8424	1/100 | 19/2200	Translation
ptc-miR7826	0.8426	1/100 | 13/2200	Cleavage
ptc-miR7829	0.8438	1/100 | 12/2200	Translation
ptc-miR473	0.8464	2/100 | 35/2200	Cleavage
ptc-miR827	0.85	1/100 | 16/2200	Cleavage
ptc-miR403	0.8501	1/100 | 20/2200	Cleavage
ptc-miR481	0.8572	1/100 | 15/2200	Cleavage
ptc-miR7815	0.8629	1/100 | 17/2200	Cleavage
ptc-miR7831	0.8634	1/100 | 14/2200	Cleavage
ptc-miR6449	0.871	1/100 | 12/2200	Cleavage
ptc-miR6472	0.8717	1/100 | 11/2200	Cleavage
ptc-miR6466	0.8767	3/100 | 26/2200	Cleavage
ptc-miR7833	0.881	1/100 | 15/2200	Cleavage
ptc-miR478	0.8948	3/100 | 34/2200	Translation
ptc-miR475	0.8991	1/100 | 51/2200	Cleavage
ptc-miR6446	0.9001	1/100 | 12/2200	Translation
ptc-miR6444	0.9028	1/100 | 11/2200	Cleavage
ptc-miR7818	0.9028	1/100 | 10/2200	Cleavage
ptc-miR530	0.9043	2/100 | 11/2200	Cleavage
ptc-miR399	0.911	3/100 | 60/2200	Cleavage
ptc-miR6448	0.9142	2/100 | 14/2200	Translation
ptc-miR172	0.9215	3/100 | 32/2200	Cleavage
ptc-miR477	0.9347	5/100 | 60/2200	Cleavage
ptc-miR171	0.9348	4/100 | 61/2200	Cleavage
ptc-miR159	0.9361	3/100 | 36/2200	Cleavage
ptc-miR7827	0.9363	1/100 | 11/2200	Cleavage
ptc-miR6475	0.9384	1/100 | 9/2200	Cleavage
ptc-miR6429	0.939	1/100 | 10/2200	Cleavage
ptc-miR7817	0.9467	2/100 | 25/2200	Cleavage
ptc-miR6427	0.9722	2/100 | 21/2200	Cleavage
ptc-miR6435	0.9802	1/100 | 8/2200	Cleavage
ptc-miR6465	0.9811	1/100 | 9/2200	Cleavage
ChIP seq binding site enrichment
chip_ARK2	6.402e-10	108/748 | 2277/42359	ARBORKNOX2
chip_ARK1	9.086e-10	525/748 | 13944/42359	ARBORKNOX1

## Sheet: dominant_enrichment
GO enrichment - molecular function
GO:0004611	0.003228	4/459 | 7/19622	phosphoenolpyruvate carboxykinase activity
GO:0003676	0.006503	103/459 | 3014/19622	nucleic acid binding
GO:0004612	0.03604	2/459 | 2/19622	phosphoenolpyruvate carboxykinase (ATP) activity
Pfam enrichment
PF00076	3.54e-09	41/670 | 325/29014	RNA recognition motif. (a.k.a. RRM, RBD, or RNP domain)
PF00916	0.004024	5/670 | 20/29014	Sulfate transporter family
PF01535	0.005889	2/670 | 607/29014	PPR repeat
PF02681	0.01071	3/670 | 7/29014	Divergent PAP2 family
PF01293	0.0114	2/670 | 2/29014	Phosphoenolpyruvate carboxykinase
PF01126	0.02805	2/670 | 3/29014	Heme oxygenase
PF01713	0.04143	2/670 | 4/29014	Smr domain
PF01544	0.04508	3/670 | 13/29014	CorA-like Mg2+ transporter protein
PF01426	0.0539	3/670 | 15/29014	BAH domain
PF00311	0.0544	2/670 | 5/29014	Phosphoenolpyruvate carboxylase
PF00326	0.05509	3/670 | 18/29014	Prolyl oligopeptidase family
PF07889	0.05739	2/670 | 6/29014	Protein of unknown function (DUF1664)
PF09335	0.0603	3/670 | 19/29014	SNARE associated Golgi protein
PF00364	0.06154	2/670 | 7/29014	Biotin-requiring enzyme
PF03556	0.06181	2/670 | 6/29014	Domain of unknown function (DUF298)
PF00560	0.06514	6/670 | 691/29014	Leucine Rich Repeat
PF05648	0.06516	2/670 | 7/29014	Peroxisomal biogenesis factor 11 (PEX11)
PF00121	0.06696	2/670 | 6/29014	Triosephosphate isomerase
PF02338	0.07284	3/670 | 22/29014	OTU-like cysteine protease
PF00080	0.07656	2/670 | 8/29014	Copper/zinc superoxide dismutase (SODC)
PF08700	0.08008	2/670 | 9/29014	Vps51/Vps67
PF02096	0.08372	2/670 | 9/29014	60Kd inner membrane protein
PF01433	0.0877	2/670 | 9/29014	Peptidase family M1
PF00179	0.09265	5/670 | 69/29014	Ubiquitin-conjugating enzyme
PF00072	0.09418	5/670 | 70/29014	Response regulator receiver domain
PF00067	0.09453	3/670 | 421/29014	Cytochrome P450
KEGG enrichment
K01610	0.01747	2/191 | 2/5582	phosphoenolpyruvate carboxykinase (ATP) [EC:4.1.1.49]
K03217	0.0272	2/191 | 5/5582	preprotein translocase subunit YidC
K01595	0.03264	2/191 | 5/5582	phosphoenolpyruvate carboxylase [EC:4.1.1.31]
K12836	0.03339	2/191 | 4/5582	splicing factor U2AF 35 kDa subunit
K00031	0.03419	2/191 | 6/5582	isocitrate dehydrogenase [EC:1.1.1.42]
K04565	0.0408	2/191 | 5/5582	Cu/Zn superoxide dismutase [EC:1.15.1.1]
K14509	0.04094	2/191 | 7/5582	ethylene receptor [EC:2.7.13.-]
K01358	0.04745	2/191 | 8/5582	ATP-dependent Clp protease, protease subunit [EC:3.4.21.92]
K06889	0.05008	2/191 | 4/5582	hemoglobin
K00670	0.06562	2/191 | 10/5582	peptide alpha-N-acetyltransferase [EC:2.3.1.88]
miRNA binding site enrichment
ptc-miR169	0.292	8/104 | 57/2200	Cleavage
ptc-miR6475	0.6841	2/104 | 9/2200	Cleavage
ptc-miR7823	0.6888	3/104 | 17/2200	Cleavage
ptc-miR6444	0.7374	2/104 | 11/2200	Cleavage
ptc-miR6457	0.7526	3/104 | 22/2200	Cleavage
ptc-miR395	0.7658	1/104 | 17/2200	Cleavage
ptc-miR6450	0.7687	1/104 | 16/2200	Cleavage
ptc-miR7813	0.7702	1/104 | 15/2200	Cleavage
ptc-miR3627	0.7776	1/104 | 18/2200	Cleavage
ptc-miR7815	0.7824	1/104 | 17/2200	Cleavage
ptc-miR827	0.7861	1/104 | 16/2200	Cleavage
ptc-miR7819	0.7877	1/104 | 19/2200	Translation
ptc-miR7833	0.7886	1/104 | 15/2200	Cleavage
ptc-miR7831	0.7894	1/104 | 14/2200	Cleavage
ptc-miR482	0.8018	3/104 | 100/2200	Translation
ptc-miR6454	0.8074	1/104 | 12/2200	Cleavage
ptc-miR6461	0.8078	1/104 | 15/2200	Cleavage
ptc-miR6448	0.8097	1/104 | 14/2200	Translation
ptc-miR6430	0.8097	1/104 | 13/2200	Cleavage
ptc-miR6469	0.8209	2/104 | 9/2200	Cleavage
ptc-miR473	0.8214	2/104 | 35/2200	Cleavage
ptc-miR6462	0.8294	2/104 | 34/2200	Translation
ptc-miR390	0.8303	2/104 | 32/2200	Cleavage
ptc-miR6470	0.831	1/104 | 14/2200	Cleavage
ptc-miR6480	0.8312	1/104 | 12/2200	Cleavage
ptc-miR7826	0.8322	1/104 | 13/2200	Cleavage
ptc-miR6426	0.8487	2/104 | 7/2200	Cleavage
ptc-miR1450	0.8564	1/104 | 12/2200	Cleavage
ptc-miR6449	0.8831	1/104 | 12/2200	Cleavage
ptc-miR399	0.9008	3/104 | 60/2200	Cleavage
ptc-miR6446	0.9116	1/104 | 12/2200	Translation
ptc-miR6445	0.913	1/104 | 11/2200	Cleavage
ptc-miR7824	0.942	1/104 | 12/2200	Cleavage
ptc-miR166	0.9456	1/104 | 11/2200	Cleavage
ptc-miR6472	0.9806	1/104 | 11/2200	Cleavage
ptc-miR6465	0.9845	1/104 | 9/2200	Cleavage
ptc-miR6452	0.9868	3/104 | 15/2200	Translation
ChIP seq binding site enrichment
chip_ARK2	6.482e-10	109/787 | 2277/42359	ARBORKNOX2
chip_ARK1	9.15e-10	538/787 | 13944/42359	ARBORKNOX1
chip_BLR	0.09344	109/787 | 4925/42359	popBELLRINGER
